# Supplementary material for: Plasmon Driven Nanocrystal Transformation by Aluminum Nano-Islands with an Alumina Layer
Source: MDPI journal article supplement (doi:10.3390/nano13050907), 2023-02-28
Supplement: s1 [file s1]

# Plasmon Driven Nanocrystal Transformation by Aluminum Nano-Islands with an Alumina Layer

Xilin Zhou <sup>1</sup>, Huan Chen <sup>1</sup>, Baobao Zhang <sup>1</sup>, Chengyun Zhang <sup>2,\*</sup>, Min Zhang <sup>1</sup>, Lei Xi <sup>1</sup>, Jinyu Li <sup>1</sup>, Zhengkun Fu <sup>1,\*</sup> and Hairong Zheng <sup>1</sup>

<sup>1</sup> School of Physics and Information Technology, Shaanxi Normal University, Xi'an 710119, China; xilin@snnu.edu.cn (X.Z.); chenhuang@snnu.edu.cn (H.C.); bbzhang@snnu.edu.cn (B.Z.); minz@snnu.edu.cn (M.Z.); leixi@snnu.edu.cn (L.X.); 15035806369@163.com (J.L.); hrzheng@snnu.edu.cn (H.Z.)

<sup>2</sup> School of Electronic Engineering, Xi'an University of Posts & Telecommunications, Xi'an 710121, China

\* Correspondence: cyzhang@xupt.edu.cn (C.Z.); zkfu@snnu.edu.cn (Z.F.)

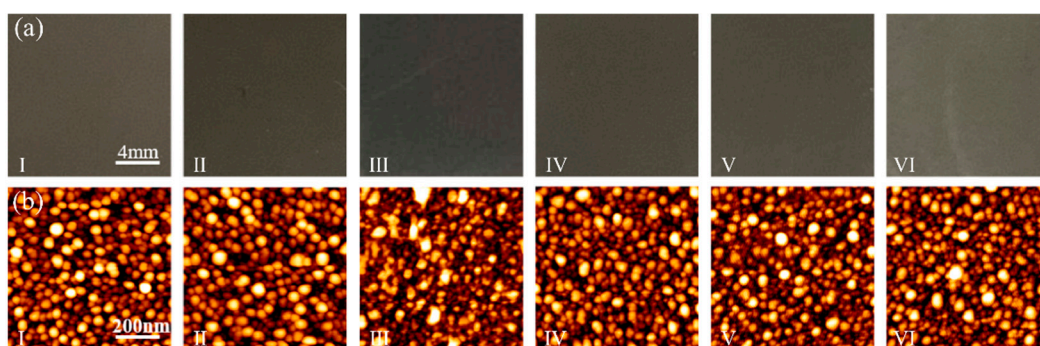

**Figure S1.** (a) Optical and (b) AFM images of the Al film without annealing (corresponding to I) and with annealing at 100 °C, 200 °C, 300 °C, 400 °C, 500 °C (corresponding to II-VI), respectively.

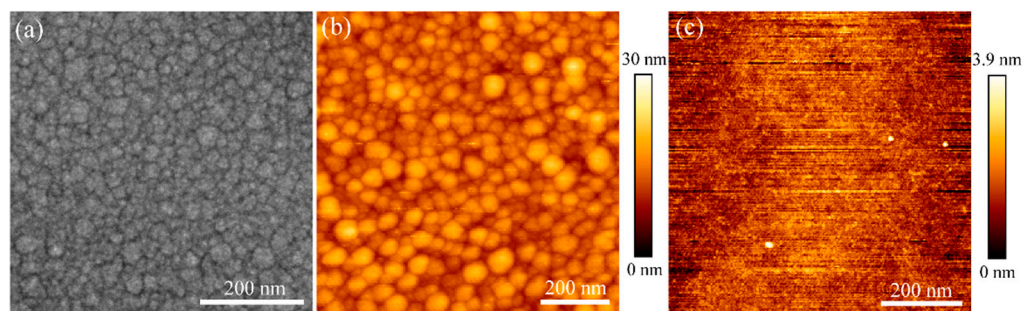

**Figure S2.** (a) SEM image and (b) AFM image of the Al/Al<sub>2</sub>O<sub>3</sub> structure. (c) AFM image of 50 nm Al<sub>2</sub>O<sub>3</sub> later.

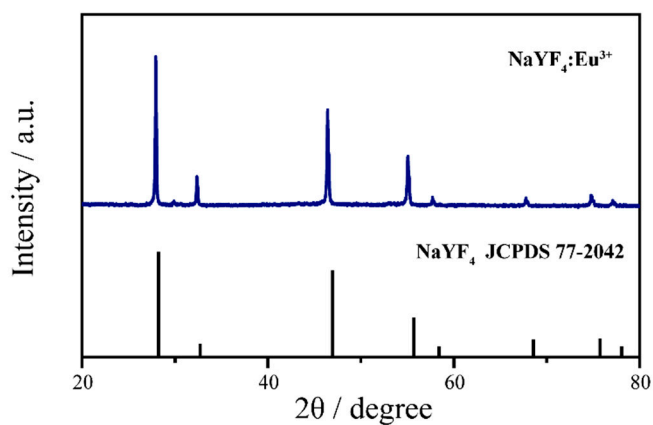

**Figure S3.** XRD pattern of the as-synthesized  $\text{NaYF}_4:\text{Eu}^{3+}$  nanoflower and the standard pattern of cubic-phase  $\text{NaYF}_4$  (JCPDS No.77-2042).

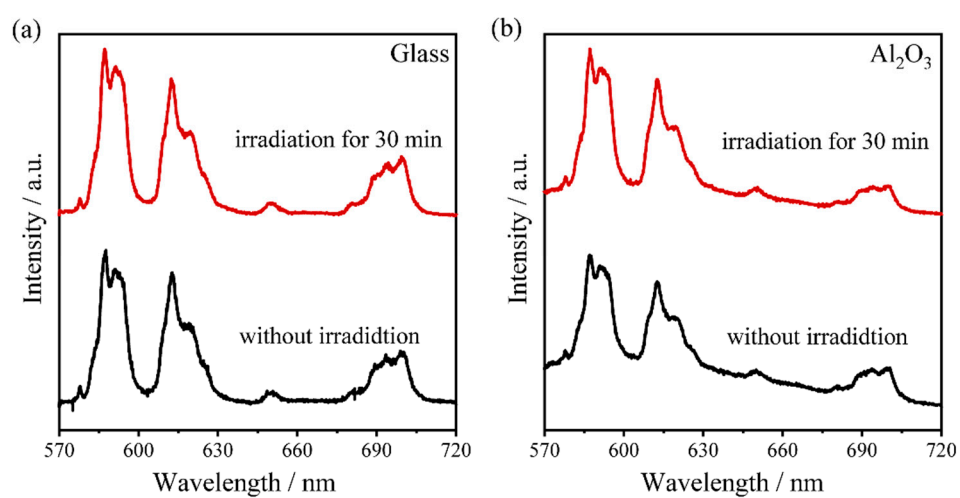

**Figure S4.** Luminescence spectra of  $\text{NaYF}_4:\text{Eu}^{3+}$  (a) on a glass substrate without Al NIs and (b) with 50 nm  $\text{Al}_2\text{O}_3$  deposited on a glass substrate before and after 976 nm (23 mW) laser irradiation for 30 min.
